# Supplementary material for: Reliability of Retinal Layer Annotation with a Novel, High-Resolution Optical Coherence Tomography Device: A Comparative Study
Source: MDPI journal article supplement (doi:10.3390/bioengineering10040438), 2023-03-31
Supplement: s1 [file s1]

# Reliability of Retinal Layer Annotation with a Novel, High-Resolution Optical Coherence Tomography Device: A Comparative Study

Von der Emde et al. Bioengineering. 2023.

## Supplemental table S1: Layer segmentation accuracy of intra-reader reliability with root mean squared error.

Root mean squared error (RMSE) and standard deviation between duplicate grading by one reader. Values marked with an asterisk are significantly smaller in the high-resolution data ( $\alpha=0.05$ ). Abbreviations: CHO: Choroid; BM: Bruch's Membrane; RPE: Retinal pigment Epithelium; IZ: Interdigitation zone; EZ: Ellipsoid Zone; ELM: External limiting membrane; OPL: Outer plexiform layer; INL: Inner nuclear Layer; IPL: Inner plexiform layer; Ganglion cell layer; RNFL: retinal nerve fiber layer; ILM: Internal limiting membrane; High-Res OCT: investigational High-Res OCT; AMD: Age-related macular degeneration.

| Modality         | Group   | Retinal layers |           |            |           |            |            |            |            |            |           |            |           |
|------------------|---------|----------------|-----------|------------|-----------|------------|------------|------------|------------|------------|-----------|------------|-----------|
|                  |         | CHO            | BM        | RPE        | IZ        | EZ         | ELM        | OPL        | INL        | IPL        | GCL       | RNFL       | ILM       |
| High-Res OCT     | AMD     | 23.3 ± 28.7    | 3.7 ± 1.6 | 4.9 ± 1.7  | 4.9 ± 1.8 | 2.8 ± 0.8  | 2.2 ± 0.5* | 3.5 ± 0.9  | 3.1 ± 0.8  | 3.6 ± 0.8* | 4.9 ± 2.5 | 3.2 ± 0.9  | 1.2 ± 1.9 |
|                  | Control | 20.8 ± 12.3    | 1.6 ± 1.9 | 2.6 ± 1.3* | 3.2 ± 1.3 | 1.6 ± 0.4* | 1.3 ± 0.4* | 2.9 ± 0.6* | 2.4 ± 0.9* | 2.9 ± 0.7* | 3.9 ± 1*  | 2.9 ± 0.8* | 0.2 ± 0.8 |
| Conventional_OCT | AMD     | 16.1 ± 13.1    | 4.9 ± 3.2 | 5.1 ± 1.5  | 5.7 ± 2   | 3.3 ± 1.4  | 3.3 ± 1.9  | 4.9 ± 3.8  | 3.6 ± 1.5  | 4.5 ± 1.3  | 5.3 ± 1.3 | 3.6 ± 0.9  | 0.3 ± 0.8 |
|                  | Control | 27.4 ± 19.3    | 1.7 ± 2.4 | 3.8 ± 1.2  | 3.4 ± 0.9 | 2.1 ± 0.5  | 2 ± 0.3    | 3.8 ± 1.1  | 3.4 ± 0.9  | 4 ± 0.7    | 6 ± 1.9   | 3.5 ± 0.7  | 0.6 ± 2.1 |

# Reliability of Retinal Layer Annotation with a Novel, High-Resolution Optical Coherence Tomography Device: A Comparative Study

Von der Emde et al. Bioengineering. 2023.

**Supplemental table S2: Layer segmentation accuracy of inter-reader reliability with the root mean squared error.** Root mean squared error (RMSE) and standard deviation between two readers. Values marked with an asterix are significantly smaller in the high-resolution data ( $\alpha=0.05$ ). Abbreviations: CHO: Choroid; BM: Bruch's Membrane; RPE: Retinal pigment Epithelium; IZ: Interdigitation zone; EZ: Ellipsoid Zone; ELM: External limiting membrane; OPL: Outer plexiform layer; INL: Inner nuclear Layer; IPL: Inner plexiform layer; Ganglion cell layer; RNFL: retinal nerve fiber layer; ILM: Internal limiting membrane; High-Res OCT: investigational High-Res OCT; AMD: Age-related macular degeneration.

| Modality         | Group   | Retinal layers |           |           |            |           |           |            |            |            |            |           |           |
|------------------|---------|----------------|-----------|-----------|------------|-----------|-----------|------------|------------|------------|------------|-----------|-----------|
|                  |         | CHO            | BM        | RPE       | IZ         | EZ        | ELM       | OPL        | INL        | IPL        | GCL        | RNFL      | ILM       |
| High-Res OCT     | AMD     | 49.3 ± 36.3    | 3.8 ± 2.9 | 7.6 ± 4.3 | 7.3 ± 2.1* | 5.1 ± 1.3 | 4 ± 1.4   | 6.2 ± 2.0* | 4.4 ± 1.4* | 4.7 ± 1.0* | 6.9 ± 2.4  | 3.9 ± 1.3 | 1.5 ± 2.5 |
|                  | Control | 59.6 ± 53.5    | 0.9 ± 1.4 | 4 ± 1.4   | 4.6 ± 1.8* | 4.8 ± 1.0 | 3.4 ± 2.7 | 6.5 ± 2.1  | 4.3 ± 2.0  | 4.9 ± 1.4* | 6.4 ± 2.2* | 3.4 ± 1.0 | 0.2 ± 0.8 |
| Conventional_OCT | AMD     | 46.5 ± 23.4    | 5 ± 3.7   | 8.2 ± 4.5 | 7.9 ± 2.2  | 6.9 ± 2.6 | 4.2 ± 1.7 | 7.9 ± 4.1  | 5.0 ± 1.2  | 5.4 ± 1.4  | 10.6 ± 3   | 4.0 ± 1.0 | 0.1 ± 0.4 |
|                  | Control | 45.5 ± 21.5    | 1.2 ± 2.5 | 4.1 ± 1.5 | 3.8 ± 1.3  | 6.8 ± 1.6 | 3 ± 0.8   | 5.6 ± 2.3  | 4.4 ± 1.2  | 5.2 ± 1.5  | 11.1 ± 3.9 | 3.9 ± 1.4 | 0.4 ± 1.6 |
